# Supplementary material for: Thermodynamic Properties of Aqueous Species Calculated Using the HKF Model: How Do Different Thermodynamic and Electrostatic Models for Solvent Water Affect Calculated Aqueous Properties?
Source: Hindawi journal article supplement (doi:10.1155/2019/5750390), 2019-02-07
Supplement: f1 [file 5750390.f1.pdf]

## Supplementary material:

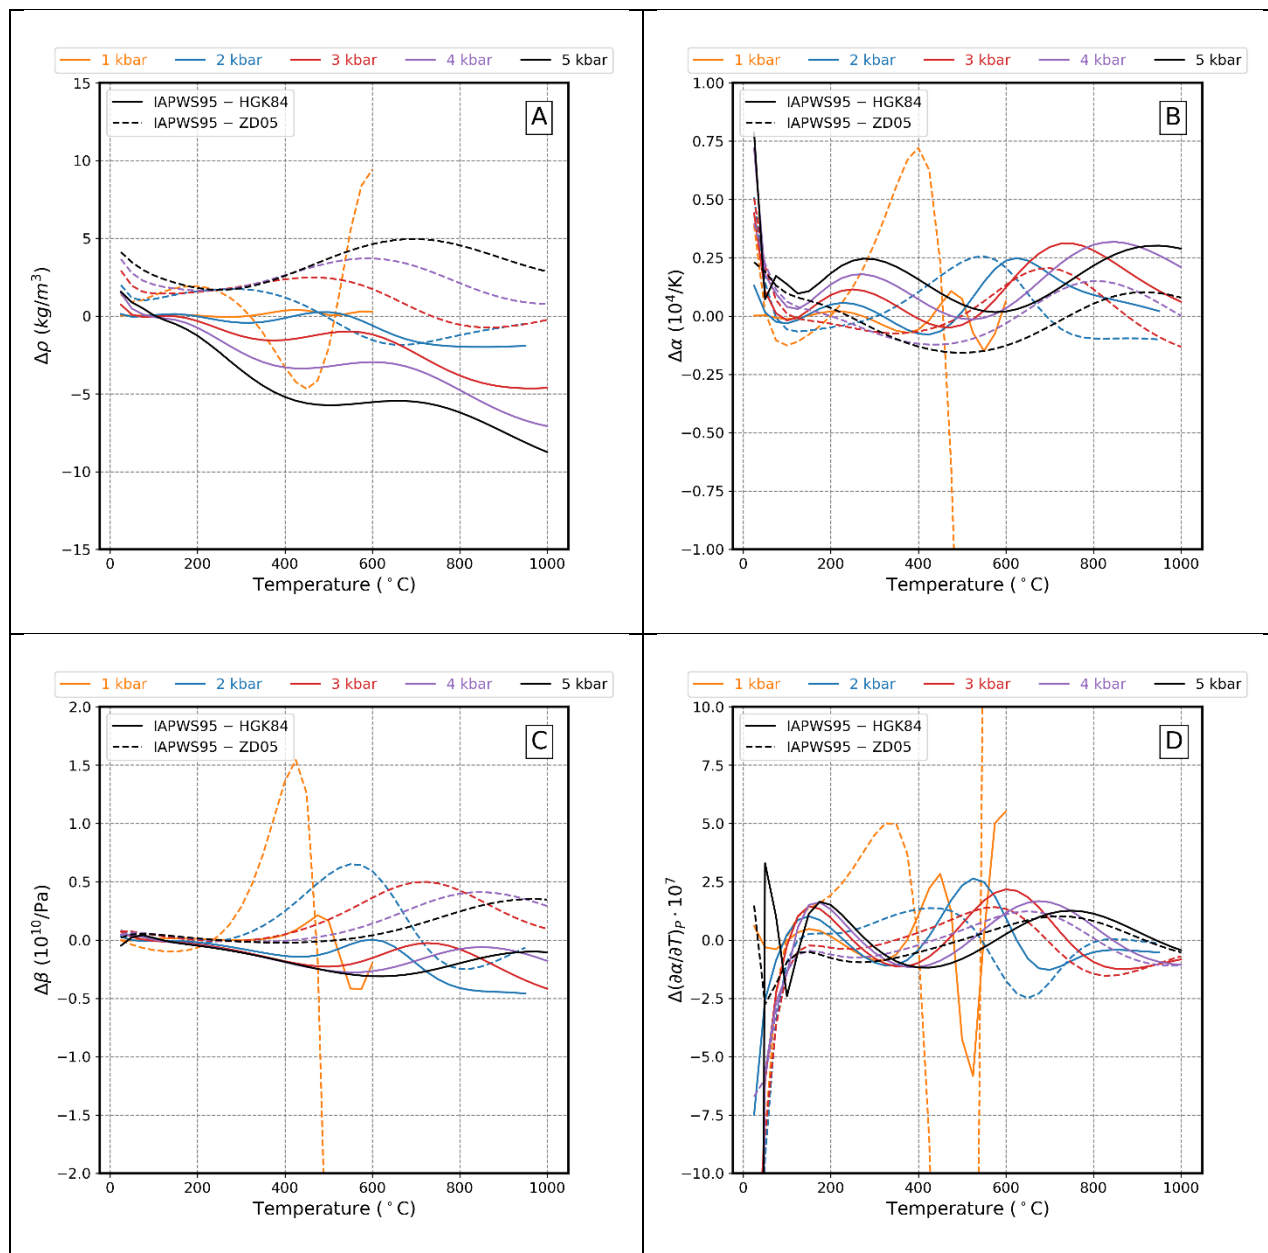

**Figure S1.** Plots showing the differences in the volumetric properties of water calculated using the HGK84 and ZD05 formulations from those obtained using the IAPWS95 model (25-1000 °C, 1-5 kbar): (A)  $\rho_{H_2O}$  (water density), (B)  $\alpha_{H_2O}$  (isobaric expansivity), (C)  $\beta_{H_2O}$  (isothermal compressibility), (D)  $(\partial\alpha/\partial T)_P$  (isobaric temperature derivative of the isobaric expansivity).

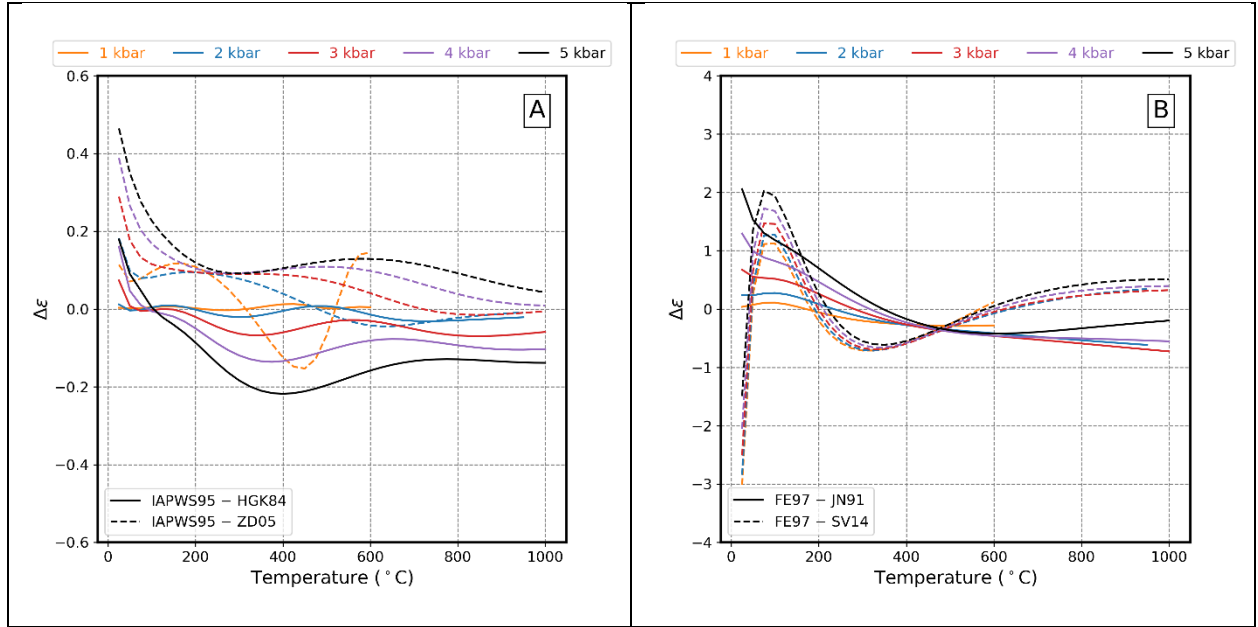

**Figure S2.** (A) Differences in  $\epsilon_{H_2O}$  calculated using the FE97 model, when using the HGK84 and ZD05 models compared to the IAPWS95 model for water density. (B) Differences in  $\epsilon_{H_2O}$ , obtained from the FE97 model, compared to the JN91 and SV14 models, all using the IAPWS95 model for water density.

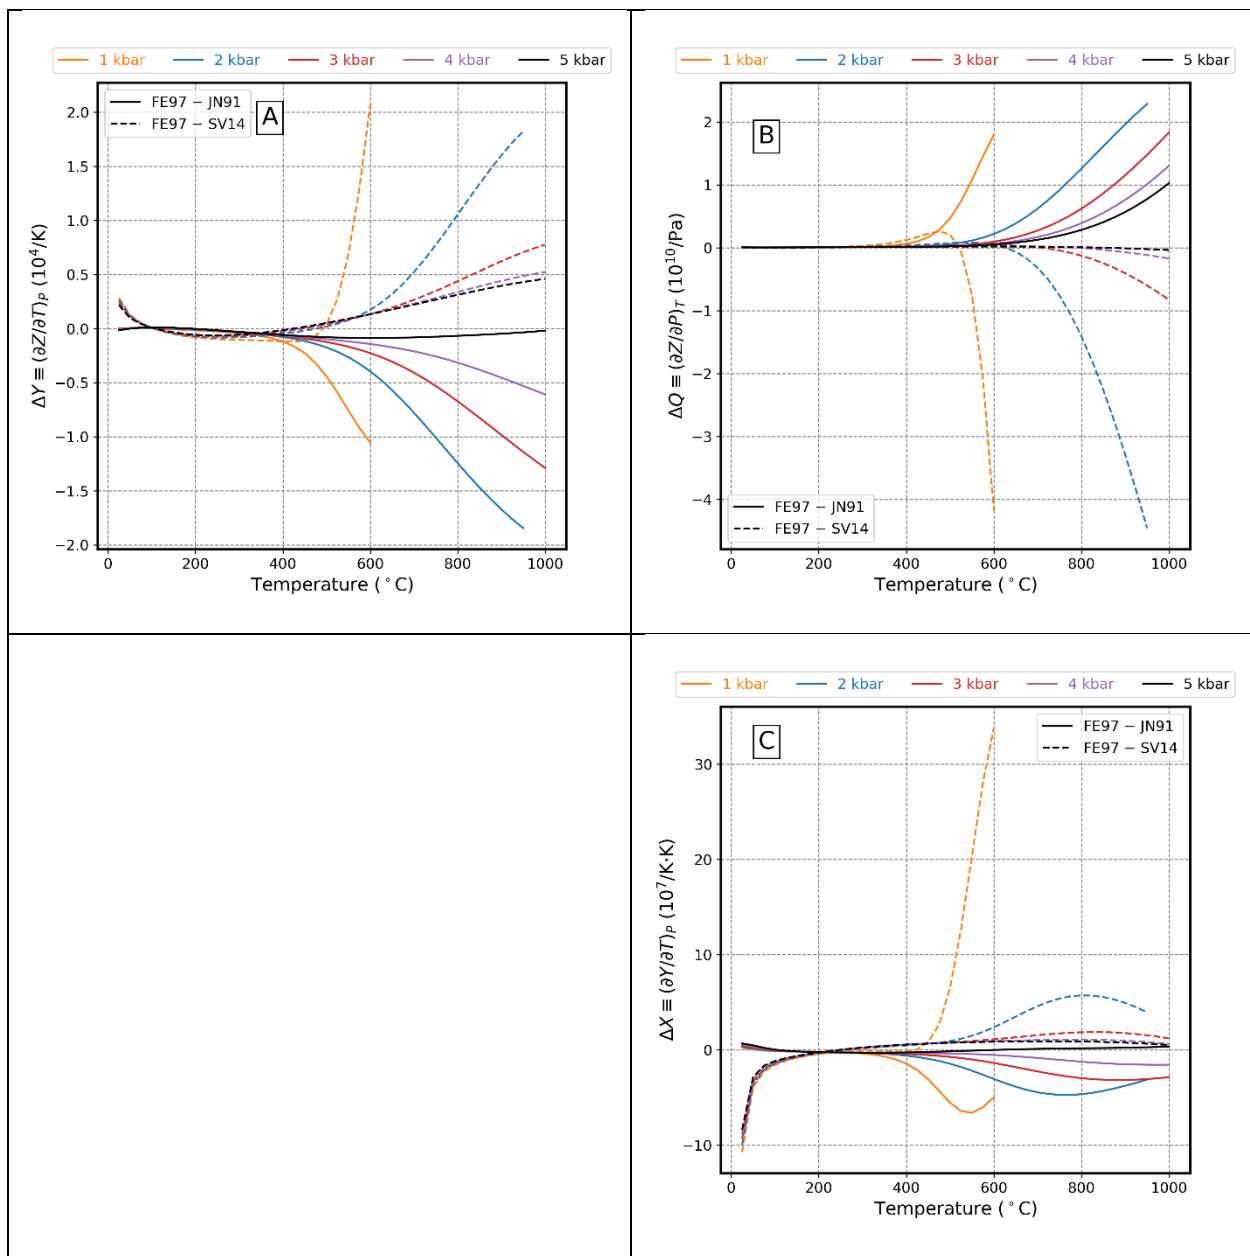

**Figure S3.** Differences in property values calculated with the JN91 and SV14 models for  $\epsilon_{\text{H}_2\text{O}}$  from those obtained using the FE97 model; the IAPWS95 model is used for  $\rho_{\text{H}_2\text{O}}$  (25-1000 °C, 1-5 kbar). (A) Born Y; (B) Born Q; (C) Born X.

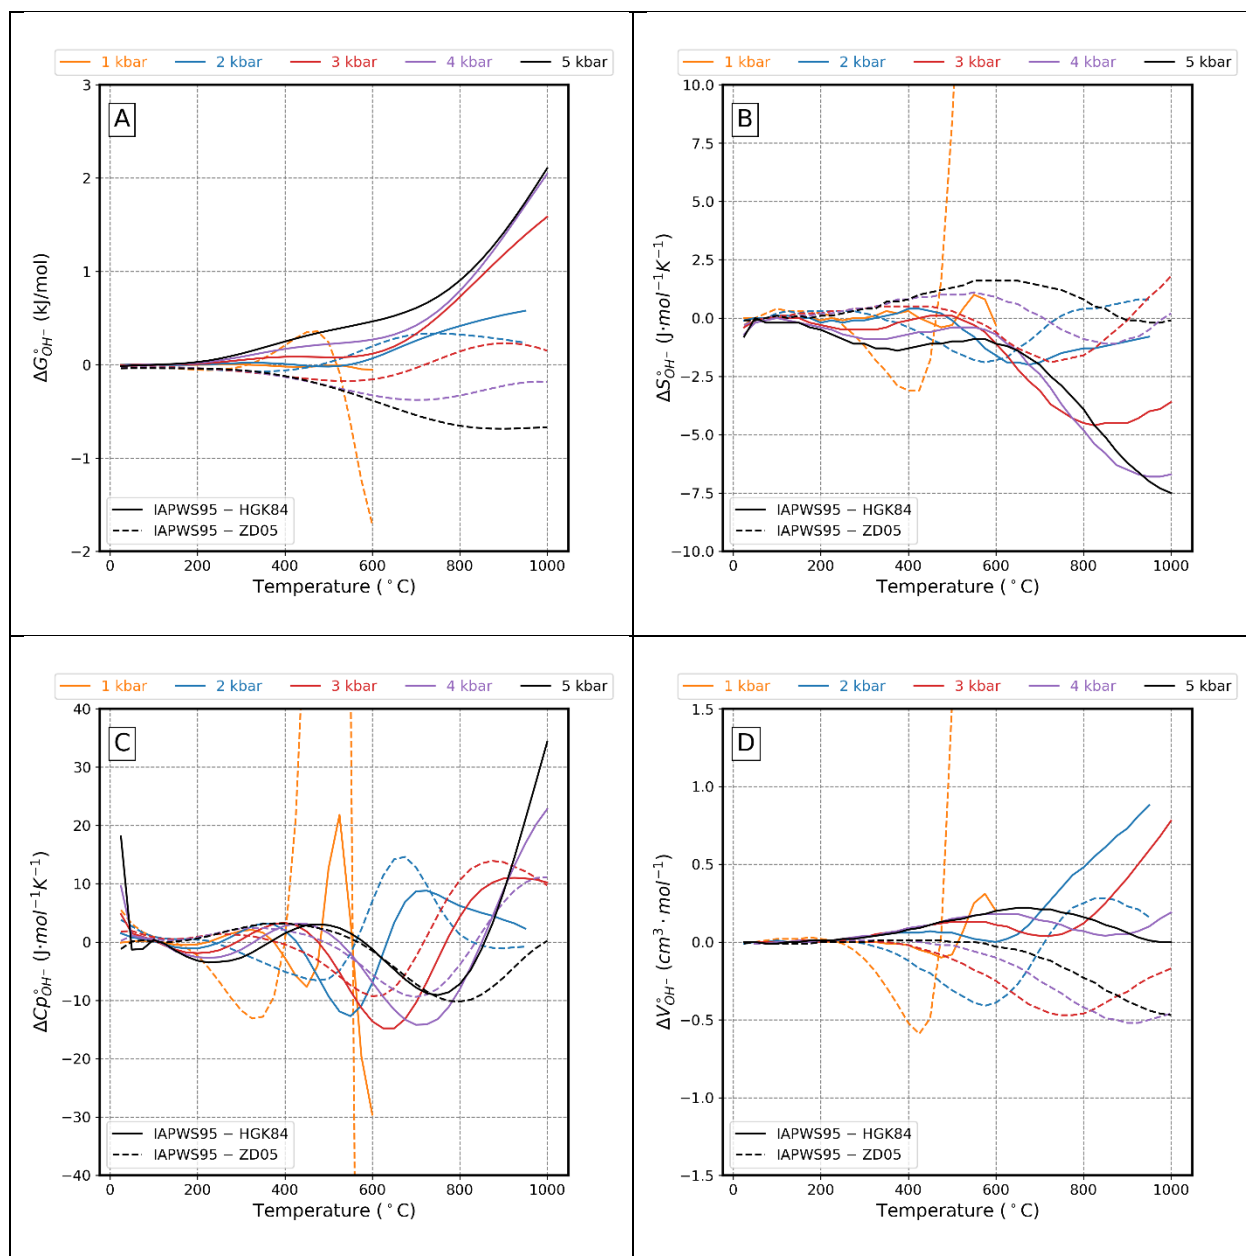

**Figure S4.** Differences in partial molal standard state properties of  $\text{OH}^-$ , calculated using different thermodynamic models: full line – difference between IAPWS95 and HGK84, and dashed line – between IAPWS95 and ZD05, all using the FE97 formulation for the water electrostatic properties: (A)  $G_{\text{OH}^-}^\circ$ ; (B)  $S_{\text{OH}^-}^\circ$ ; (C)  $Cp_{\text{OH}^-}^\circ$ ; (D)  $V_{\text{OH}^-}^\circ$ .

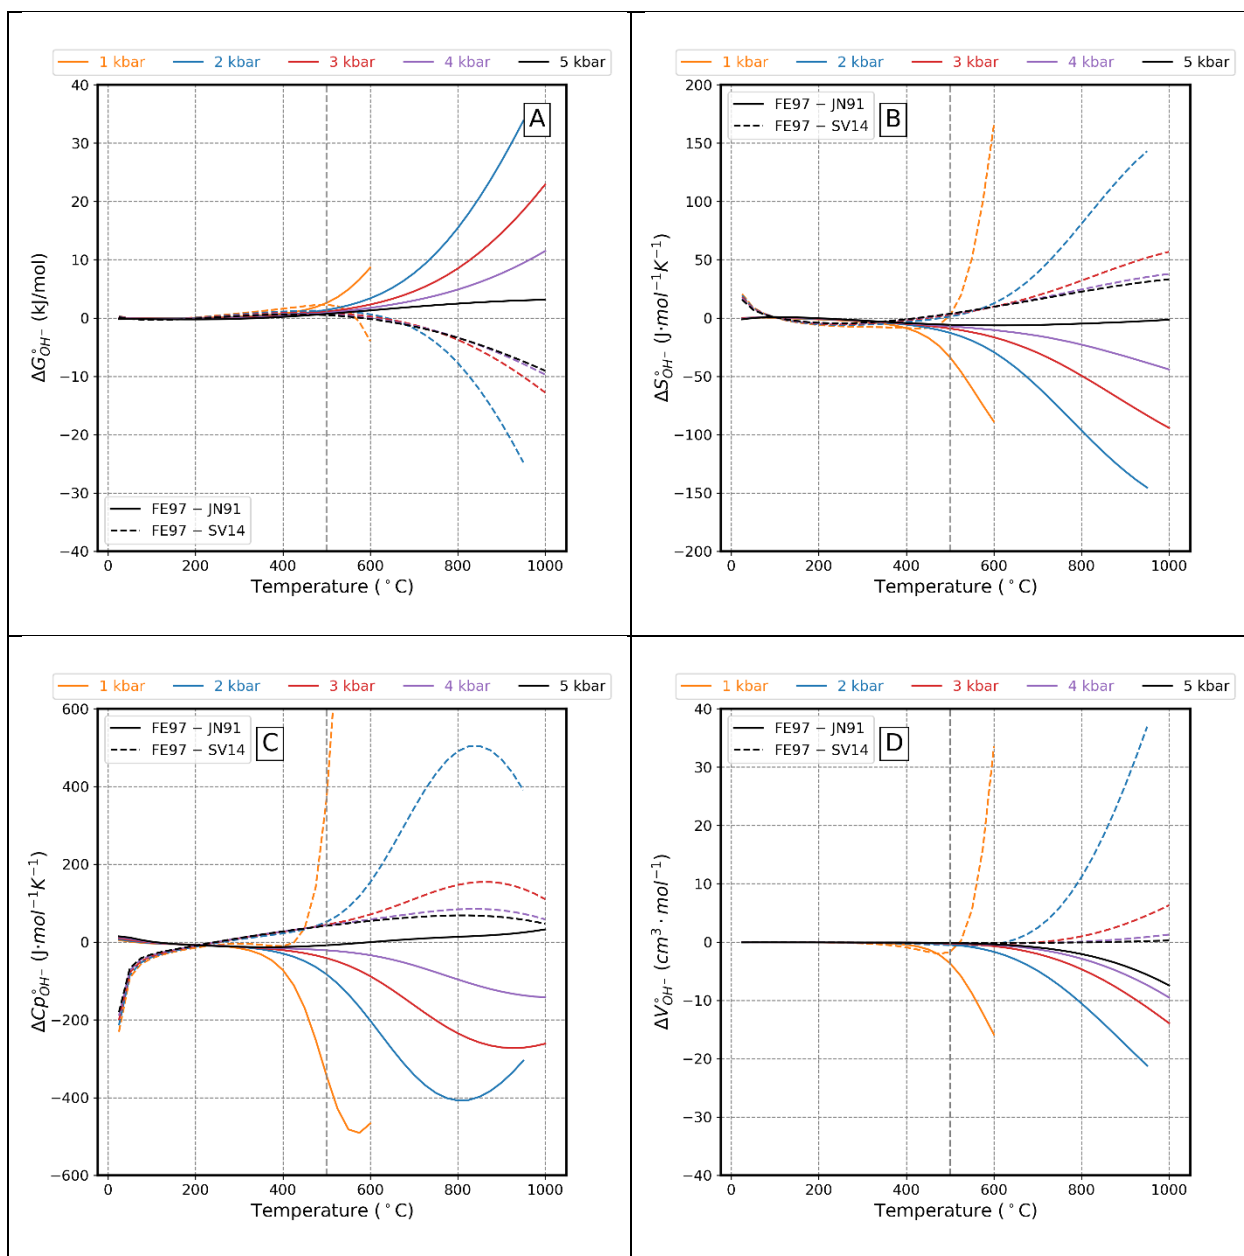

**Figure S5.** Differences in partial molal standard state properties of  $\text{OH}^-$ , calculated using different electrostatic models: full lines -- difference between FE97 and JN91, and dashed lines -- between FE97 and SV14 models for calculating water dielectric properties, all using IAPWS95 for water density: (A)  $G_{\text{OH}^-}^\circ$ ; (B)  $S_{\text{OH}^-}^\circ$ ; (C)  $C_{p\text{OH}^-}^\circ$ ; (D)  $V_{\text{OH}^-}^\circ$ . Dashed line intersects at 500 °C.
